# Supplementary material for: Lactational Stage of Pasteurized Human Donor Milk Contributes to Nutrient Limitations for Infants
Source: MDPI journal article supplement (doi:10.3390/nu9030302), 2017-03-18
Supplement: s1 [file s1]

# Supplementary Materials: Lactational Stage of Pasteurized Human Donor Milk Contributes to Nutrient Limitations for Infants

Christina J. Valentine, Georgia Morrow, Amanda Reisinger, Kelly A. Dingess, Ardythe L. Morrow and Lynette K. Rogers

**Table S1.** Fatty acid levels in individual samples obtained from Regional Milk Banks.

| <i>mg/100 mL</i> | California       |            | Colorado         |            | Michigan         |            | Ohio             |            | Texas            |            | <i>r</i> <sup>2</sup><br><i>(adjusted)</i> | <i>p</i> |
|------------------|------------------|------------|------------------|------------|------------------|------------|------------------|------------|------------------|------------|--------------------------------------------|----------|
|                  | <i>mean ± SD</i> | <i>med</i> | <i>mean ± SD</i> | <i>med</i> | <i>mean ± SD</i> | <i>med</i> | <i>mean ± SD</i> | <i>med</i> | <i>mean ± SD</i> | <i>med</i> |                                            |          |
| <b>C10:0</b>     | 19.1 ± 9.8       | 16.8       | 25.1 ± 14.8      | 20.7       | 29.5 ± 11.5      | 24.4       | 23.6 ± 15.0      | 19.3       | 25.5 ± 13.9      | 23.2       | 0.000                                      | 0.424    |
| <b>C12:0</b>     | 113 ± 52.0       | 96.0       | 113 ± 50.7       | 114        | 166 ± 60.9       | 143        | 158 ± 91.3       | 124        | 148 ± 65.8       | 139        | 0.014                                      | 0.302    |
| <b>C14:0</b>     | 135 ± 56.0       | 118        | 137 ± 47.3       | 131        | 218 ± 78.6       | 207        | 200 ± 109        | 172        | 169 ± 59.0       | 169        | 0.063                                      | 0.074    |
| <b>C16:0</b>     | 512 ± 210        | 474        | 548 ± 154        | 564        | 813 ± 181        | 811        | 681 ± 245        | 616        | 685 ± 221        | 616        | 0.134                                      | 0.006    |
| <b>C16:1□7</b>   | 63.5 ± 26.5      | 62.0       | 69.6 ± 29.6      | 60.7       | 92.8 ± 23.0      | 94.3       | 64.2 ± 23.3      | 65.0       | 75.3 ± 22.9      | 70.6       | 0.135                                      | 0.006    |
| <b>C18:0</b>     | 171 ± 73.9       | 159        | 190 ± 57.5       | 192        | 256 ± 70.4       | 252        | 220 ± 58.0       | 219        | 234 ± 78.9       | 206        | 0.114                                      | 0.013    |
| <b>C18:1□9</b>   | 883 ± 323        | 832        | 913 ± 257        | 944        | 1241 ± 283       | 1233       | 1060 ± 277       | 969        | 1122 ± 301       | 1092       | 0.115                                      | 0.013    |
| <b>C18:1□7</b>   | 67.7 ± 25.2      | 64.5       | 78.3 ± 24.5      | 82.1       | 104 ± 29.1       | 109.7      | 90.9 ± 25.9      | 73.1       | 88.1 ± 27.8      | 94.4       | 0.124                                      | 0.009    |
| <b>C18:2□6</b>   | 469 ± 179        | 461        | 614 ± 134        | 541        | 753 ± 202        | 761        | 701 ± 189        | 665        | 663 ± 178        | 717        | 0.234                                      | 0.000    |
| <b>C18:3□6</b>   | 6.56 ± 1.45      | 6.30       | 6.52 ± 1.81      | 6.30       | 8.32 ± 2.60      | 7.71       | 5.15 ± 3.00      | 4.98       | 6.46 ± 2.22      | 5.77       | 0.137                                      | 0.005    |
| <b>C18:3□3</b>   | 88.8 ± 31.6      | 92.1       | 92.5 ± 14.5      | 96.1       | 123 ± 35.2       | 126        | 116 ± 30.1       | 106        | 106 ± 34.4       | 102        | 0.125                                      | 0.009    |
| <b>C20:4□6</b>   | 30.1 ± 8.7       | 28.5       | 31.1 ± 8.3       | 31.2       | 37.5 ± 9.9       | 36.6       | 31.6 ± 9.5       | 32.1       | 32.8 ± 6.0       | 30.9       | 0.122                                      | 0.010    |
| <b>C20:5□3</b>   | 3.76 ± 0.65      | 3.56       | 3.99 ± 1.15      | 3.51       | 3.28 ± 0.92      | 3.04       | 2.23 ± 0.74      | 2.28       | 2.77 ± 0.71      | 2.60       | 0.121                                      | 0.010    |
| <b>C22:6□3</b>   | 7.22 ± 3.15      | 6.51       | 8.00 ± 5.09      | 5.82       | 7.24 ± 5.95      | 6.39       | 7.22 ± 3.82      | 5.88       | 8.02 ± 4.61      | 6.96       | 0.020                                      | 0.259    |

Data were analyzed by multivariate regression with Center as the fixed variable and lactational stage as a co-variate. Multivariate tests (Pillai's Trace) revealed statistical differences in Center ( $p = 0.000$ ) and lactational stage ( $p = 0.026$ ) across the model. Between-subject effects are indicated on the table. Data in gray indicates statistical significance at 0.05 (med = median).

**Table S2.** Amino acid levels in individual samples obtained from Regional Milk Banks.

| <i>mg/100 mL</i>     | California       |            | Colorado         |            | Michigan         |            | Ohio             |            | Texas            |            | <i>r</i> <sup>2</sup><br>(adjusted) | <i>p</i> |
|----------------------|------------------|------------|------------------|------------|------------------|------------|------------------|------------|------------------|------------|-------------------------------------|----------|
|                      | <i>mean ± SD</i> | <i>med</i> | <i>mean ± SD</i> | <i>med</i> | <i>mean ± SD</i> | <i>med</i> | <i>mean ± SD</i> | <i>med</i> | <i>mean ± SD</i> | <i>med</i> |                                     |          |
| <b>Phosphoserine</b> | 91.2 ± 32.2      | 78.8       | 95.9 ± 34.5      | 82.7       | 82.5 ± 20.8      | 80.5       | 70.2 ± 16.2      | 65.90      | 92.1 ± 36.1      | 79.2       | 0.247                               | 0.000    |
| <b>Taurine</b>       | 6.14 ± 3.12      | 5.78       | 7.60 ± 4.79      | 7.51       | 5.29 ± 3.50      | 3.60       | 4.83 ± 3.27      | 5.09       | 8.29 ± 5.86      | 7.21       | 0.061                               | 0.079    |
| <b>Aspartic Acid</b> | 97.1 ± 21.3      | 95.4       | 93.6 ± 26.7      | 83.9       | 86.0 ± 15.9      | 87.3       | 75.2 ± 13.2      | 71.8       | 97.1 ± 39.3      | 78.5       | 0.194                               | 0.001    |
| <b>Threonine</b>     | 41.3 ± 10.5      | 39.6       | 36.0 ± 13.0      | 30.7       | 36.1 ± 5.38      | 35.8       | 31.8 ± 6.17      | 30.0       | 40.9 ± 14.6      | 35.5       | 0.180                               | 0.001    |
| <b>Serine</b>        | 52.5 ± 11.4      | 52.0       | 48.5 ± 15.4      | 43.0       | 45.4 ± 8.75      | 47.1       | 40.2 ± 7.40      | 38.7       | 53.8 ± 23.74     | 42.52      | 0.181                               | 0.001    |
| <b>Glutamic Acid</b> | 198 ± 37.0       | 190        | 183 ± 43.6       | 171        | 172 ± 20.7       | 169.3      | 162 ± 21.2       | 158        | 180 ± 45.9       | 162.7      | 0.185                               | 0.001    |
| <b>Proline</b>       | 95.0 ± 23.7      | 89.9       | 83.3 ± 28.3      | 71.2       | 82.9 ± 12.6      | 82.6       | 73.3 ± 11.8      | 71.7       | 76.2 ± 20.1      | 70.1       | 0.139                               | 0.005    |
| <b>Glycine</b>       | 24.4 ± 5.8       | 24.2       | 24.1 ± 6.36      | 22.2       | 21.98 ± 3.48     | 21.3       | 18.6 ± 3.42      | 17.4       | 25.7 ± 11.2      | 20.0       | 0.198                               | 0.006    |
| <b>Alanine</b>       | 43.7 ± 9.00      | 44.7       | 41.8 ± 13.5      | 37.4       | 38.66 ± 7.96     | 40.1       | 33.3 ± 6.03      | 33.3       | 44.6 ± 20.9      | 34.5       | 0.157                               | 0.003    |
| <b>Valine</b>        | 36.9 ± 8.62      | 36.3       | 31.1 ± 13.9      | 27.4       | 31.6 ± 4.57      | 30.7       | 30.6 ± 9.00      | 26.3       | 40.8 ± 20.2      | 32.9       | 0.128                               | 0.008    |
| <b>Methionine</b>    | 17.0 ± 4.03      | 16.5       | 15.9 ± 6.20      | 14.1       | 14.6 ± 4.12      | 14.9       | 13.2 ± 2.93      | 13.2       | 16.8 ± 6.98      | 13.8       | 0.187                               | 0.001    |
| <b>Isoleucine</b>    | 34.0 ± 9.57      | 30.8       | 28.6 ± 12.5      | 23.9       | 28.6 ± 5.01      | 27.7       | 26.0 ± 5.96      | 24.5       | 28.6 ± 7.40      | 28.1       | 0.161                               | 0.002    |
| <b>Leucine</b>       | 93.3 ± 22.0      | 90.1       | 73.9 ± 26.0      | 68.0       | 81.6 ± 17.1      | 77.6       | 72.2 ± 13.9      | 68.0       | 83.9 ± 24.6      | 76.2       | 0.182                               | 0.001    |
| <b>Tyrosine</b>      | 48.4 ± 13.0      | 48.7       | 45.2 ± 16.3      | 41.2       | 41.9 ± 12.5      | 39.6       | 36.1 ± 8.73      | 35.2       | 47.0 ± 24.1      | 33.3       | 0.119                               | 0.011    |
| <b>Phenylalanine</b> | 35.2 ± 8.40      | 35.0       | 30.0 ± 13.5      | 26.0       | 31.8 ± 8.64      | 31.3       | 26.6 ± 4.99      | 24.9       | 34.9 ± 14.1      | 28.8       | 0.139                               | 0.005    |
| <b>Tryptophan</b>    | 182 ± 39.9       | 171        | 172 ± 40.7       | 167        | 172 ± 22.0       | 167.1      | 169 ± 26.9       | 165        | 179 ± 35.3       | 184.3      | 0.051                               | 0.108    |
| <b>Lysine</b>        | 64.1 ± 14.3      | 61.5       | 58.2 ± 19.3      | 50.5       | 54.8 ± 9.99      | 55.0       | 48.3 ± 10.0      | 45.6       | 59.7 ± 20.1      | 52.3       | 0.198                               | 0.000    |
| <b>Histidine</b>     | 21.1 ± 5.52      | 19.6       | 19.0 ± 6.44      | 16.1       | 18.8 ± 3.02      | 18.8       | 17.0 ± 3.30      | 16.2       | 20.1 ± 6.34      | 18.4       | 0.156                               | 0.003    |
| <b>Arginine</b>      | 35.0 ± 9.10      | 35.4       | 32.7 ± 12.1      | 28.9       | 32.6 ± 8.95      | 34.0       | 29.0 ± 6.93      | 27.1       | 41.3 ± 20.8      | 31.0       | 0.147                               | 0.004    |

Data were analyzed by multivariate regression with Center as the fixed variable and lactational stage as a co-variate. Multivariate tests (Pillai's Trace) revealed statistical differences between Centers ( $p = 0.000$ ) and lactational stage ( $p = 0.000$ ) across the model. Between-subject effects are indicated on the table. Data in gray indicates statistical significance at 0.05 (med = median).
